# Supplementary material
Source: PubMed Central journal article supplement (PMC6794257)

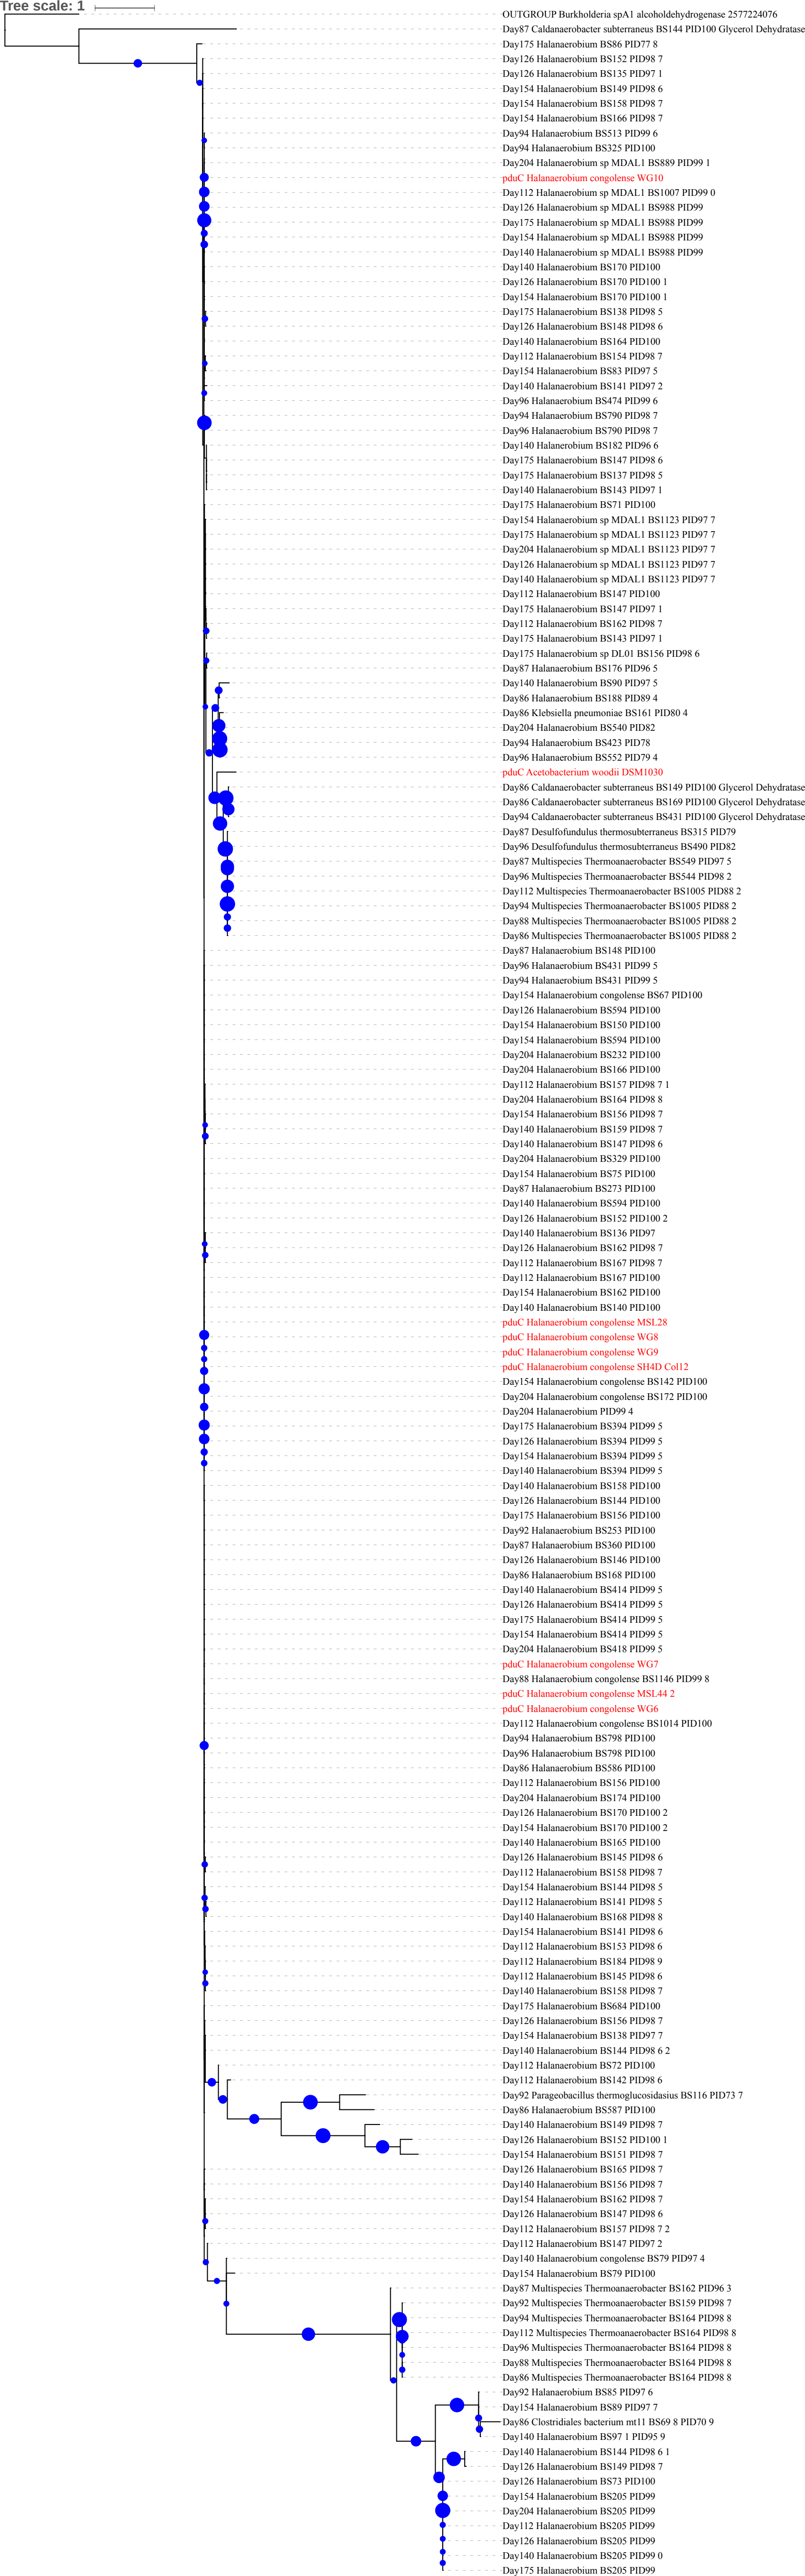

Supplement: 41396_2019_466_MOESM2_ESM.pdf [file 41396_2019_466_MOESM2_ESM.pdf]
